# Supplementary material for: A protein-encoding CCDC7 circular RNA inhibits the progression of prostate cancer by up-regulating FLRT3
Source: PubMed Central journal article supplement (PMC10789799; doi:10.1038/s41698-024-00503-2), 2024-01-16
Supplement: 41698_2024_503_MOESM2_ESM.pdf [file 41698_2024_503_MOESM2_ESM.pdf]

## Reporting Summary

Nature Portfolio wishes to improve the reproducibility of the work that we publish. This form provides structure for consistency and transparency in reporting. For further information on Nature Portfolio policies, see our [Editorial Policies](#) and the [Editorial Policy Checklist](#).

### Statistics

For all statistical analyses, confirm that the following items are present in the figure legend, table legend, main text, or Methods section.

n/a | Confirmed

- The exact sample size ( $n$ ) for each experimental group/condition, given as a discrete number and unit of measurement
- A statement on whether measurements were taken from distinct samples or whether the same sample was measured repeatedly
- The statistical test(s) used AND whether they are one- or two-sided  
*Only common tests should be described solely by name; describe more complex techniques in the Methods section.*
- A description of all covariates tested
- A description of any assumptions or corrections, such as tests of normality and adjustment for multiple comparisons
- A full description of the statistical parameters including central tendency (e.g. means) or other basic estimates (e.g. regression coefficient) AND variation (e.g. standard deviation) or associated estimates of uncertainty (e.g. confidence intervals)
- For null hypothesis testing, the test statistic (e.g.  $F$ ,  $t$ ,  $r$ ) with confidence intervals, effect sizes, degrees of freedom and  $P$  value noted  
*Give  $P$  values as exact values whenever suitable.*
- For Bayesian analysis, information on the choice of priors and Markov chain Monte Carlo settings
- For hierarchical and complex designs, identification of the appropriate level for tests and full reporting of outcomes
- Estimates of effect sizes (e.g. Cohen's  $d$ , Pearson's  $r$ ), indicating how they were calculated

*Our web collection on [statistics for biologists](#) contains articles on many of the points above.*

### Software and code

Policy information about [availability of computer code](#)

Data collection

Data analysis

For manuscripts utilizing custom algorithms or software that are central to the research but not yet described in published literature, software must be made available to editors and reviewers. We strongly encourage code deposition in a community repository (e.g. GitHub). See the Nature Portfolio [guidelines for submitting code & software](#) for further information.

### Data

Policy information about [availability of data](#)

All manuscripts must include a [data availability statement](#). This statement should provide the following information, where applicable:

- Accession codes, unique identifiers, or web links for publicly available datasets
- A description of any restrictions on data availability
- For clinical datasets or third party data, please ensure that the statement adheres to our [policy](#)

## Research involving human participants, their data, or biological material

Policy information about studies with [human participants or human data](#). See also policy information about [sex, gender \(identity/presentation\), and sexual orientation](#) and [race, ethnicity and racism](#).

|                                                                    |                                                                                                                                                            |
|--------------------------------------------------------------------|------------------------------------------------------------------------------------------------------------------------------------------------------------|
| Reporting on sex and gender                                        | This study was lack of sex- and gender-based analysis because the prostate cancer can only be found in male.                                               |
| Reporting on race, ethnicity, or other socially relevant groupings | This study didn't describe people according to race, ethnicity or other socially constructed categories.                                                   |
| Population characteristics                                         | There was no covariate population characteristic of the human participants                                                                                 |
| Recruitment                                                        | The tissues and clinical information was used with written informed consents from the patients who have undergone radical prostatectomy from 2020 to 2021. |
| Ethics oversight                                                   | Sun Yat-sen University's Committees for Ethical Review of Research Involving Human Subjects                                                                |

Note that full information on the approval of the study protocol must also be provided in the manuscript.

## Field-specific reporting

Please select the one below that is the best fit for your research. If you are not sure, read the appropriate sections before making your selection.

Life sciences  Behavioural & social sciences  Ecological, evolutionary & environmental sciences

For a reference copy of the document with all sections, see [nature.com/documents/nr-reporting-summary-flat.pdf](https://www.nature.com/documents/nr-reporting-summary-flat.pdf)

## Life sciences study design

All studies must disclose on these points even when the disclosure is negative.

|                 |                                                                                                                                                                                                                                                                                                    |
|-----------------|----------------------------------------------------------------------------------------------------------------------------------------------------------------------------------------------------------------------------------------------------------------------------------------------------|
| Sample size     | 23 pairs of clinical samples from cancer and adjacent areas were used. The larger the sample size, the more it can get the right conclusion. It is generally believed that clinical data exceeding 5 pairs can get a conclusion, including many single cell sequencing and RNA sequencing studies. |
| Data exclusions | No data was excluded from the analysis                                                                                                                                                                                                                                                             |
| Replication     | All attempts at replication were successful.                                                                                                                                                                                                                                                       |
| Randomization   | All the samples were allocated as paired tumor and normal from the same patient.                                                                                                                                                                                                                   |
| Blinding        | Blinding was not relevant to this study because we need to distinguish tumor samples from adjacent normal.                                                                                                                                                                                         |

## Reporting for specific materials, systems and methods

We require information from authors about some types of materials, experimental systems and methods used in many studies. Here, indicate whether each material, system or method listed is relevant to your study. If you are not sure if a list item applies to your research, read the appropriate section before selecting a response.

### Materials & experimental systems

| n/a                                 | Involvement in the study                                        |
|-------------------------------------|-----------------------------------------------------------------|
| <input type="checkbox"/>            | <input checked="" type="checkbox"/> Antibodies                  |
| <input type="checkbox"/>            | <input checked="" type="checkbox"/> Eukaryotic cell lines       |
| <input checked="" type="checkbox"/> | <input type="checkbox"/> Palaeontology and archaeology          |
| <input type="checkbox"/>            | <input checked="" type="checkbox"/> Animals and other organisms |
| <input type="checkbox"/>            | <input checked="" type="checkbox"/> Clinical data               |
| <input checked="" type="checkbox"/> | <input type="checkbox"/> Dual use research of concern           |
| <input checked="" type="checkbox"/> | <input type="checkbox"/> Plants                                 |

### Methods

| n/a                                 | Involvement in the study                        |
|-------------------------------------|-------------------------------------------------|
| <input checked="" type="checkbox"/> | <input type="checkbox"/> ChIP-seq               |
| <input checked="" type="checkbox"/> | <input type="checkbox"/> Flow cytometry         |
| <input checked="" type="checkbox"/> | <input type="checkbox"/> MRI-based neuroimaging |

## Antibodies

|                 |                                                                                                                                                                                                                                               |
|-----------------|-----------------------------------------------------------------------------------------------------------------------------------------------------------------------------------------------------------------------------------------------|
| Antibodies used | Primary antibodies: FLAG [1:1000; 14793; Cell Signaling Technology (CST)], FLRT3 (1:500; YN1973; ImmunoW), Slug (1:500; YN5478; ImmunoW), GAPDH (1:1000; 97166S; CST), E-cadherin (1:500; YT1454; ImmunoW) and Claudin1 (1:1000; 13255; CST). |
|-----------------|-----------------------------------------------------------------------------------------------------------------------------------------------------------------------------------------------------------------------------------------------|

## Validation

The validation of all the primary antibodies above were come from the companies' website: <http://www.immunoway.com/> and <https://www.cellsignal.cn/>. The company has provided corresponding verification documents on their website.

## Eukaryotic cell lines

Policy information about [cell lines and Sex and Gender in Research](#)

|                                                                   |                                                                                                                                      |
|-------------------------------------------------------------------|--------------------------------------------------------------------------------------------------------------------------------------|
| Cell line source(s)                                               | 293T, HCT116, PrEC LH, LNCaP, C4-2, PC3, DU145, NCI-H660, and LASCPC-01 were purchased from ATCC (American Type Culture Collection). |
| Authentication                                                    | The cell lines above were originally purchased from ATCC and have been confirmed by STR genotyping in our previous studies.          |
| Mycoplasma contamination                                          | We conduct routine testing for Mycoplasma every few months and the results showed no Mycoplasma contamination.                       |
| Commonly misidentified lines (See <a href="#">ICLAC</a> register) | Not applicable                                                                                                                       |

## Animals and other research organisms

Policy information about [studies involving animals; ARRIVE guidelines](#) recommended for reporting animal research, and [Sex and Gender in Research](#)

|                         |                                                                                                                                                                                                                                    |
|-------------------------|------------------------------------------------------------------------------------------------------------------------------------------------------------------------------------------------------------------------------------|
| Laboratory animals      | Immunocompromised BALB/c adult male mice                                                                                                                                                                                           |
| Wild animals            | Immunocompromised BALB/c adult male mice (6–8 weeks old)                                                                                                                                                                           |
| Reporting on sex        | Findings only apply to one sex because the prostate cancer can only be found in male.                                                                                                                                              |
| Field-collected samples | Animals were housed in sterilized plastic cages under specific pathogen-free conditions, at 22°C, 12/12 light/dark cycle, 55% humidity. The end of the experiments was the time when the tumor volume exceed 1500mm <sup>3</sup> . |
| Ethics oversight        | University of Virginia Institutional Animal Care and Use Committee                                                                                                                                                                 |

Note that full information on the approval of the study protocol must also be provided in the manuscript.

## Clinical data

Policy information about [clinical studies](#)

All manuscripts should comply with the ICMJE [guidelines for publication of clinical research](#) and a completed [CONSORT checklist](#) must be included with all submissions.

|                             |                |
|-----------------------------|----------------|
| Clinical trial registration | Not applicable |
| Study protocol              | Not applicable |
| Data collection             | Not applicable |
| Outcomes                    | Not applicable |

## Plants

|                       |                |
|-----------------------|----------------|
| Seed stocks           | Not applicable |
| Novel plant genotypes | Not applicable |
| Authentication        | Not applicable |
